# Supplementary material for: The level and trend of road traffic injuries attributable mortality rate in Iran, 1990–2015: a story of successful regulations and a roadmap to design future policies
Source: PubMed Central journal article supplement (PMC8459502; doi:10.1186/s12889-021-11721-9), 2021-09-22

1990

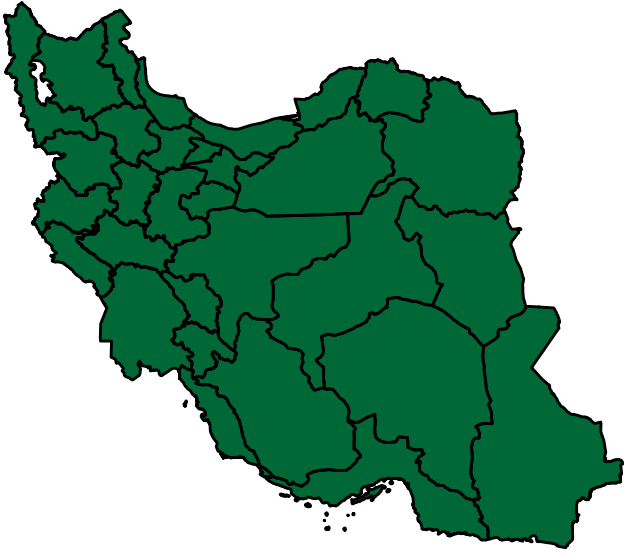

1995

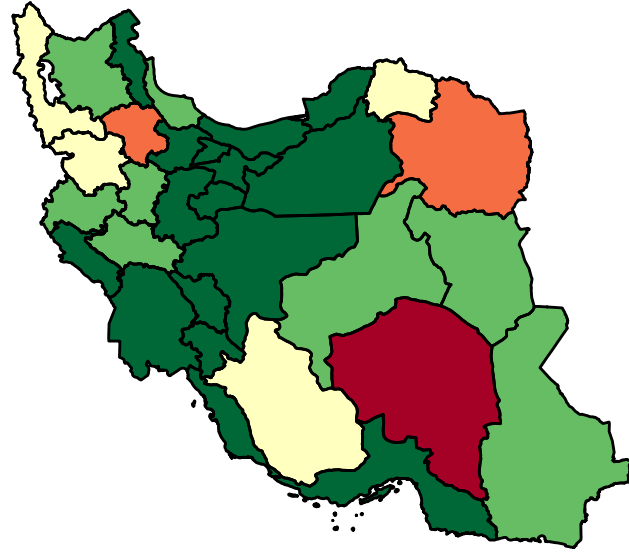

2000

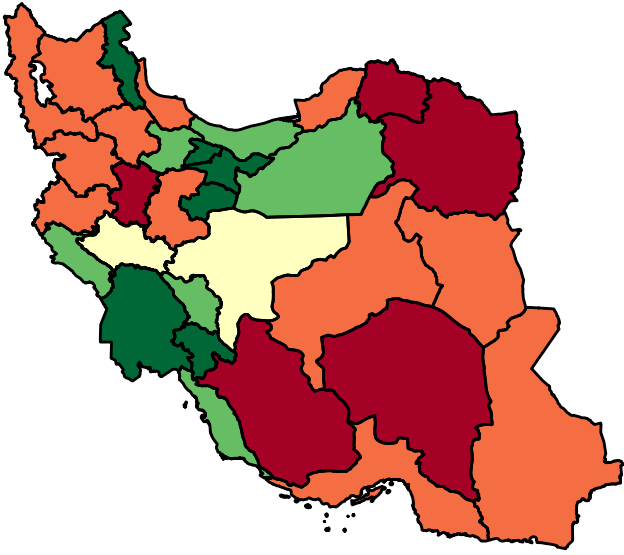

2005

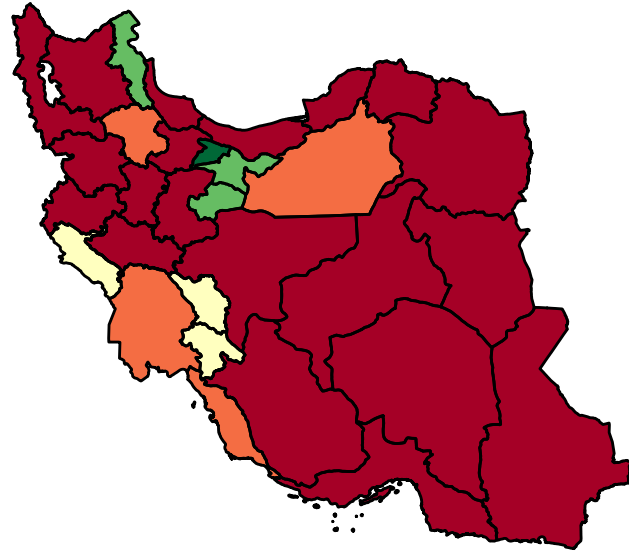

Age standardized mortality rate (per 100,000)

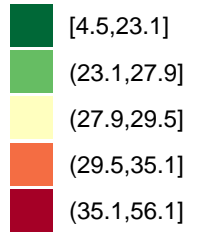

2010

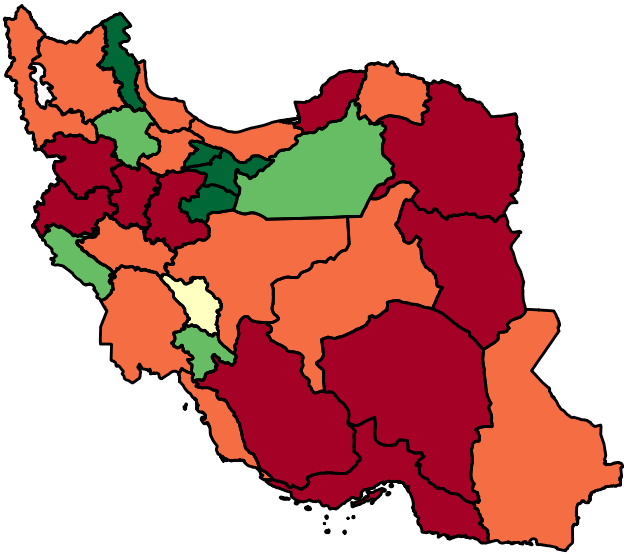

2015

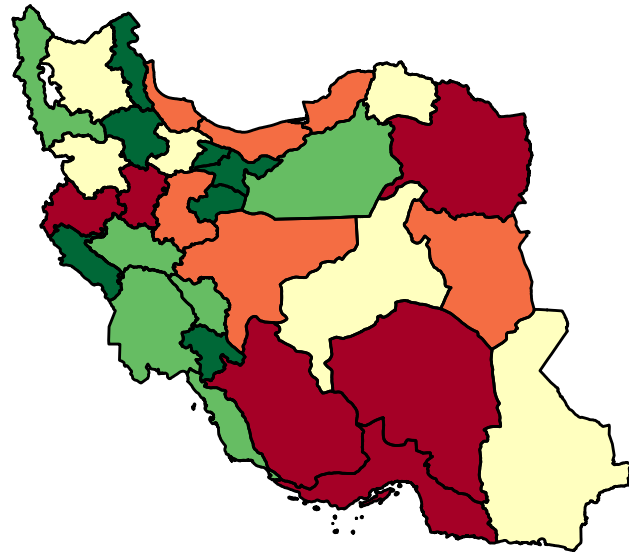

Supplement: 12889_2021_11721_MOESM1_ESM.pdf [file 12889_2021_11721_MOESM1_ESM.pdf]
