# Supplementary material for: The level and trend of road traffic injuries attributable mortality rate in Iran, 1990–2015: a story of successful regulations and a roadmap to design future policies
Source: PubMed Central journal article supplement (PMC8459502; doi:10.1186/s12889-021-11721-9), 2021-09-22
Supplement: 12889_2021_11721_MOESM4_ESM.pdf [file 12889_2021_11721_MOESM4_ESM.pdf]

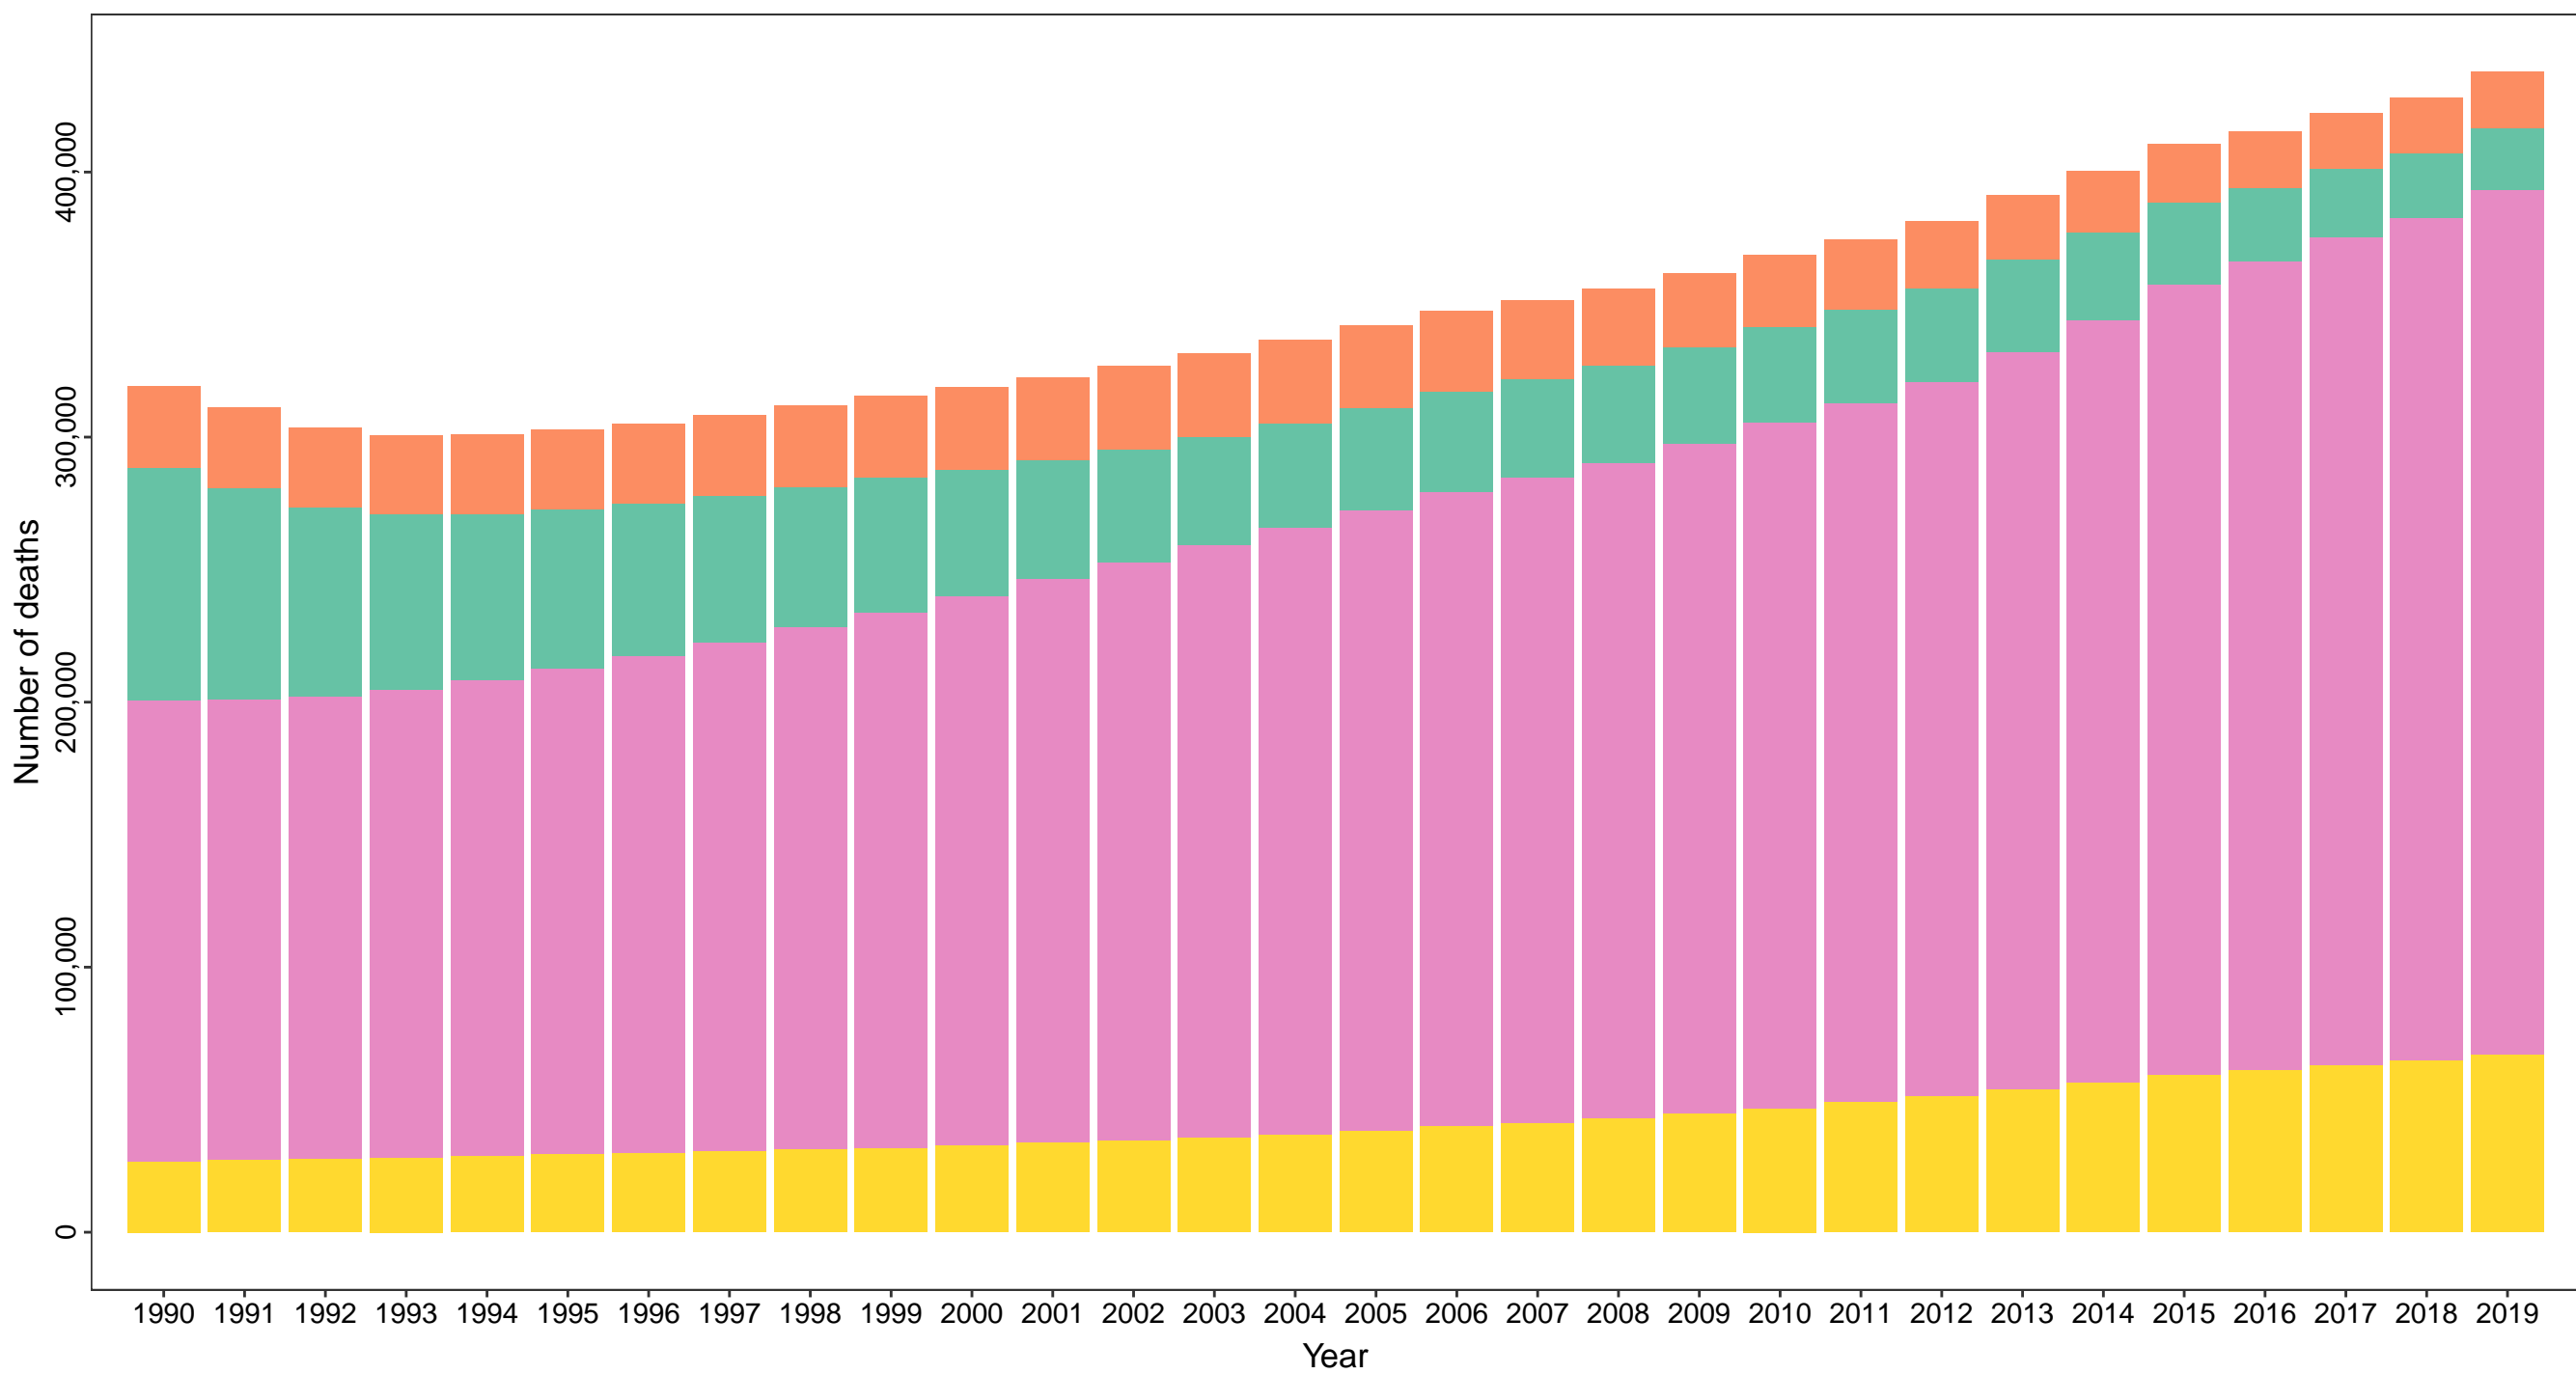

■ Road injuries
 ■ Communicable diseases
 ■ Non-Communicable Diseases
 ■ Total Cancers
